# Supplementary material
Source: PubMed Central journal article supplement (PMC3394593)
Supplement: NIHMS388027-supplement-Fig_S1_S2_figure_legends.pdf [file NIHMS388027-supplement-Fig_S1_S2_figure_legends.pdf]

Supplemental Figure 1, Panels A and B: TLR4 mutation in C57BL/10ScNJ ameliorates the pathology of ischemic AKI at 24 hr reperfusion. Low power. Representative low power photomicrographs of C57BL/10ScNJ TLR4 (+/+) kidney (Panel A, low power), and C57BL/10ScNJ TLR4 (-/-) kidney (Panel B, low power). "G" = glomerulus; "C" = cast within necrotic tubule. Red arrows indicate leukocytes. High power views (Panels C and D) are in next Supplemental Figure.

Supplemental Figure 1, Panels A and B: TLR4 mutation in C57BL/10ScNJ ameliorates the pathology of ischemic AKI at 24 hr reperfusion. Low power. Representative low power photomicrographs of C57BL/10ScNJ TLR4 (+/+) kidney (Panel A, low power), and C57BL/10ScNJ TLR4 (-/-) kidney (Panel B, low power). "G" = glomerulus; "C" = cast within necrotic tubule. Red arrows indicate leukocytes. High power views (Panels C and D) are in next Supplemental Figure.

Supplemental Figure 2: Vascular congestion in the inner stripe of the outer medulla (ISOM) allows dissection of the kidney into distinct regions. We cut the kidney along its long axis and the dark lines show how the [OSOM+cortex] may be dissected from the congested (red) ISOM, and the ISOM from the inner medulla (papilla) as described in the text. The inset shows a kidney cut along its short axis and the dotted lines show how the the [OSOM+cortex] was dissected from the ISOM from this view.
